# Supplementary material
Source: PubMed Central journal article supplement (PMC4004406)
Supplement: bcp0077-0861-sd1.pdf [file bcp0077-0861-sd1.pdf]

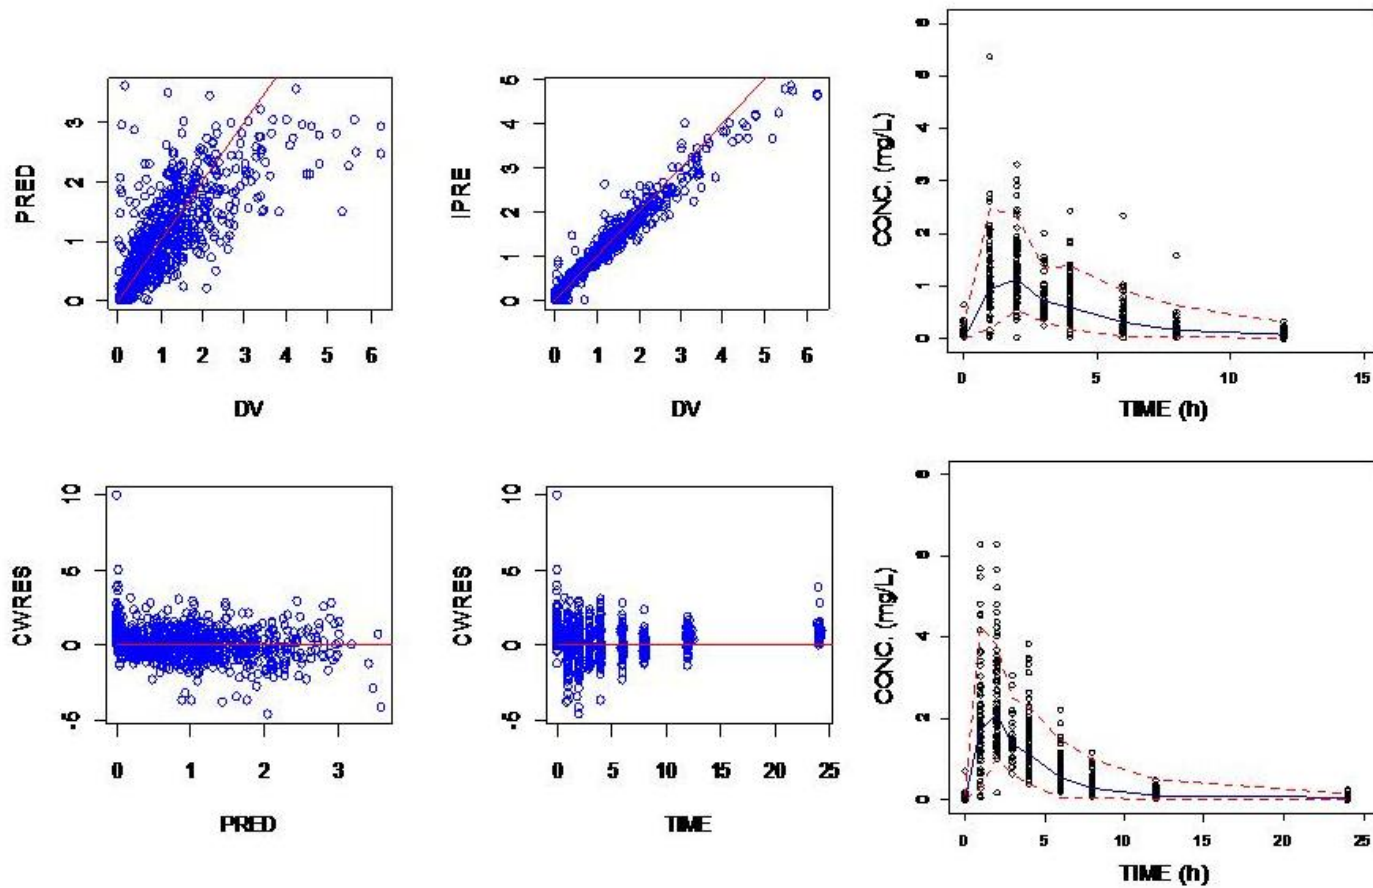

Figure S1. (a) Goodness-of-fit (left). Left upper panel shows the population prediction (PRED) vs. observed concentration values (DV). Right upper panel shows individual predictions (IPRE) vs. observed concentration values (DV). Left lower panel shows conditional weighted residuals (CWRES) vs. population predictions (PRED). Right lower panel shows conditional weighted residuals (CWRES) vs. time (TIME). Solid red line represents the identity line. (b) Visual predictive check (VPC) of the population PK model for lamivudine (right). The dots represent observed concentrations; the dotted red lines represent the 95% confidence interval of the simulated values. The solid blue line represents the median of the simulated profiles. The VPC of the data following twice daily (left) and once daily (right) dosing shows that, approximately 95% of the dots lie within the expected boundaries. These results indicate that model predictions encompass the observed data accurately irrespective of the dosing regimen
